# Supplementary material for: Recent Progress of Protein Tertiary Structure Prediction
Source: MDPI journal article supplement (doi:10.3390/molecules29040832), 2024-02-13
Supplement: s1 [file s1]

# **Supplementary Information for**

## **Recent progress of protein tertiary structure prediction**

Qiqige Wuyun, Yihan Chen, Yifeng Shen, Yang Cao, Gang Hu, Wei Cui, Jianzhao Gao, Wei Zheng

### **Table of Content**

#### **Supplementary Figures**

**Fig. S1.** An illustration of co-evolutionary information contained in multiple sequence alignments and the corresponding relationship with residue-residue contact prediction.

#### **Supplementary Tables**

- Table S1.** Tools for template-based protein structure prediction.
- Table S2.** Tools for template free (free modeling) protein structure prediction.
- Table S3.** Tools for contact-based protein structure prediction.
- Table S4.** Tools for distance-based protein structure prediction.
- Table S5.** Tools for end-to-end protein structure prediction.
- Table S6.** Tools for protein language model-based protein structure prediction.
- Table S7.** Tools for multi-domain protein structure prediction.
- Table S8.** The monomer protein dataset from CASP14 used in our benchmark tests.

## Supplementary Figures

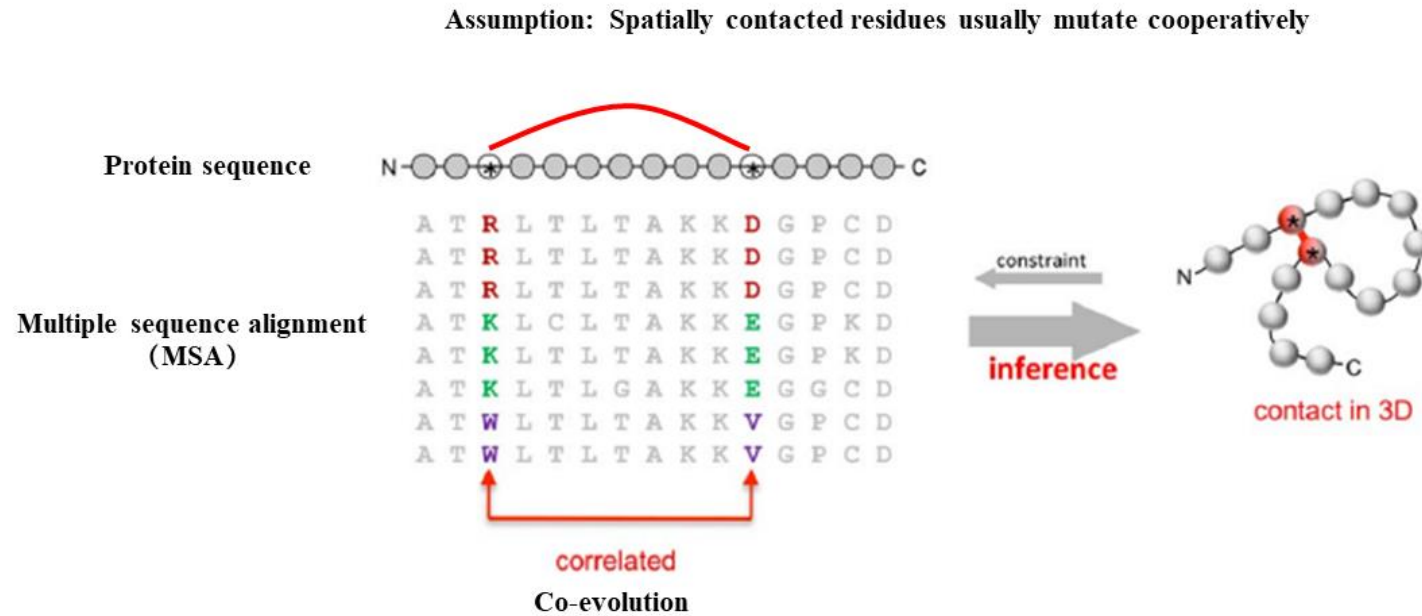

**Figure S1.** An illustration of co-evolutionary information contained in multiple sequence alignments and the corresponding relationship with residue-residue contact prediction.

## Supplementary Tables

**Table S1.** Tools for template-based protein structure prediction.

| Methods       | URLs                                                                                                                                                                                                                       | Reference |
|---------------|----------------------------------------------------------------------------------------------------------------------------------------------------------------------------------------------------------------------------|-----------|
| CEthreader    | <a href="https://zhanglab.dcm.b.med.umich.edu/CEthreader/">https://zhanglab.dcm.b.med.umich.edu/CEthreader/</a>                                                                                                            | [1]       |
| DEDAL         | <a href="https://github.com/google-research/google-research/tree/master/dedal">https://github.com/google-research/google-research/tree/master/dedal</a>                                                                    | [2]       |
| DisCovER      | <a href="https://github.com/Bhattacharya-Lab/DisCovER">https://github.com/Bhattacharya-Lab/DisCovER</a>                                                                                                                    | [3]       |
| EBA           | <a href="https://git.scicore.unibas.ch/schwede/EBA">https://git.scicore.unibas.ch/schwede/EBA</a><br><a href="https://git.scicore.unibas.ch/schwede/eba_benchmark">https://git.scicore.unibas.ch/schwede/eba_benchmark</a> | [4]       |
| EigenTHREADER | <a href="https://github.com/psipred/eigenthreader">https://github.com/psipred/eigenthreader</a>                                                                                                                            | [5]       |
| FFAS-3D       | <a href="https://ffas.godziklab.org/ffas-cgi/cgi/ffas.pl">https://ffas.godziklab.org/ffas-cgi/cgi/ffas.pl</a>                                                                                                              | [6]       |
| HHpred        | <a href="https://github.com/soedinglab/hh-suite/tree/master/scripts/hhpred">https://github.com/soedinglab/hh-suite/tree/master/scripts/hhpred</a>                                                                          | [7]       |
| HHsearch      | <a href="https://github.com/soedinglab/hh-suite">https://github.com/soedinglab/hh-suite</a>                                                                                                                                | [8]       |
| I-TASSER      | <a href="https://zhanglab.dcm.b.med.umich.edu/I-TASSER/">https://zhanglab.dcm.b.med.umich.edu/I-TASSER/</a>                                                                                                                | [9-11]    |
| LOMETS        | <a href="https://zhanglab.dcm.b.med.umich.edu/LOMETS/">https://zhanglab.dcm.b.med.umich.edu/LOMETS/</a>                                                                                                                    | [12-14]   |
| map_align     | <a href="https://github.com/sokrypton/map_align">https://github.com/sokrypton/map_align</a><br><a href="https://github.com/gjoni/map_align">https://github.com/gjoni/map_align</a>                                         | [15]      |
| MODELLER      | <a href="https://salilab.org/modeller/">https://salilab.org/modeller/</a>                                                                                                                                                  | [16]      |
| MRAlign       | <a href="http://raptorx6.uchicago.edu">http://raptorx6.uchicago.edu</a>                                                                                                                                                    | [17]      |
| MULTICOM      | <a href="https://multicom-toolbox.mu.hekademeia.org">https://multicom-toolbox.mu.hekademeia.org</a>                                                                                                                        | [18, 19]  |
| MUSTER        | <a href="https://zhanglab.dcm.b.med.umich.edu/MUSTER/">https://zhanglab.dcm.b.med.umich.edu/MUSTER/</a>                                                                                                                    | [20]      |
| Phyre2        | <a href="http://www.sbg.bio.ic.ac.uk/phyre2/">http://www.sbg.bio.ic.ac.uk/phyre2/</a>                                                                                                                                      | [21]      |
| pLM-BLAST     | <a href="https://toolkit.tuebingen.mpg.de/tools/plmbblast">https://toolkit.tuebingen.mpg.de/tools/plmbblast</a><br><a href="https://github.com/labstructbioinf/pLM-BLAST">https://github.com/labstructbioinf/pLM-BLAST</a> | [22]      |
| RaptorX       | <a href="https://github.com/j3xugit/RaptorX-3DModeling">https://github.com/j3xugit/RaptorX-3DModeling</a><br><a href="http://raptorx6.uchicago.edu">http://raptorx6.uchicago.edu</a>                                       | [23, 24]  |

|            |                                                                                                                                         |      |
|------------|-----------------------------------------------------------------------------------------------------------------------------------------|------|
| RosettaCM  | <a href="https://www.rosettacommons.org/software/license-and-download">https://www.rosettacommons.org/software/license-and-download</a> | [25] |
| SAdLSA     | <a href="https://sites.gatech.edu/cssb/sadlsa/">https://sites.gatech.edu/cssb/sadlsa/</a>                                               | [26] |
| SparksX    | <a href="https://sparks-lab.org/server/sparks-x/">https://sparks-lab.org/server/sparks-x/</a>                                           | [27] |
| ThreaderAI | <a href="https://github.com/ShenLab/ThreaderAI">https://github.com/ShenLab/ThreaderAI</a>                                               | [28] |

---

**Table S2.** Tools for template free (free modeling) protein structure prediction.

| Methods  | URLs                                                                                                                                                                                                               | Reference |
|----------|--------------------------------------------------------------------------------------------------------------------------------------------------------------------------------------------------------------------|-----------|
| FragFold | <a href="https://github.com/psipred/fragfold">https://github.com/psipred/fragfold</a>                                                                                                                              | [29]      |
| QUARK    | <a href="https://zhanglab.dcmf.med.umich.edu/QUARK/">https://zhanglab.dcmf.med.umich.edu/QUARK/</a>                                                                                                                | [30]      |
| Rosetta  | <a href="https://rosetta.bakerlab.org">https://rosetta.bakerlab.org</a><br><a href="https://www.rosettacommons.org/software/license-and-download">https://www.rosettacommons.org/software/license-and-download</a> | [31, 32]  |

**Table S3.** Tools for contact-based protein structure prediction.

| Methods         | URLs                                                                                                                                                                               | Reference |
|-----------------|------------------------------------------------------------------------------------------------------------------------------------------------------------------------------------|-----------|
| CEthreader      | <a href="https://zhanglab.dcmf.med.umich.edu/CEthreader/">https://zhanglab.dcmf.med.umich.edu/CEthreader/</a>                                                                      | [1]       |
| C-I-TASSER      | <a href="https://zhanglab.dcmf.med.umich.edu/C-I-TASSER/">https://zhanglab.dcmf.med.umich.edu/C-I-TASSER/</a>                                                                      | [33]      |
| CONFOLD2        | <a href="https://github.com/multicom-toolbox/CONFOLD2/">https://github.com/multicom-toolbox/CONFOLD2/</a>                                                                          | [34]      |
| C-QUARK         | <a href="https://seq2fun.dcmf.med.umich.edu/C-QUARK/">https://seq2fun.dcmf.med.umich.edu/C-QUARK/</a>                                                                              | [35]      |
| EigenTHREADER   | <a href="https://github.com/psipred/eigenthreader">https://github.com/psipred/eigenthreader</a>                                                                                    | [5]       |
| LOMETS2         | <a href="https://zhanglab.dcmf.med.umich.edu/LOMETS/">https://zhanglab.dcmf.med.umich.edu/LOMETS/</a>                                                                              | [12-14]   |
| map_align       | <a href="https://github.com/sokrypton/map_align">https://github.com/sokrypton/map_align</a><br><a href="https://github.com/gjoni/map_align">https://github.com/gjoni/map_align</a> | [15]      |
| RaptorX-Contact | <a href="https://github.com/j3xugit/RaptorX-Contact">https://github.com/j3xugit/RaptorX-Contact</a>                                                                                | [36]      |

**Table S4.** Tools for distance-based protein structure prediction.

| Methods       | URLs                                                                                                                                                                                                                                                                                              | Reference |
|---------------|---------------------------------------------------------------------------------------------------------------------------------------------------------------------------------------------------------------------------------------------------------------------------------------------------|-----------|
| DeepFold      | <a href="https://zhanggroup.org/DeepFold/">https://zhanggroup.org/DeepFold/</a>                                                                                                                                                                                                                   | [37]      |
| DeepPotential | <a href="https://zhanggroup.org/DeepPotential/">https://zhanggroup.org/DeepPotential/</a>                                                                                                                                                                                                         | [38]      |
| DeepThreader  | <a href="http://raptorx6.uchicago.edu">http://raptorx6.uchicago.edu</a>                                                                                                                                                                                                                           | [39]      |
| DisCover      | <a href="https://github.com/Bhattacharya-Lab/DisCover">https://github.com/Bhattacharya-Lab/DisCover</a>                                                                                                                                                                                           | [3]       |
| D-I-TASSER    | <a href="https://zhanggroup.org/D-I-TASSER/">https://zhanggroup.org/D-I-TASSER/</a>                                                                                                                                                                                                               | [40, 41]  |
| DMPfold       | <a href="http://bioinf.cs.ucl.ac.uk/psipred/">http://bioinf.cs.ucl.ac.uk/psipred/</a><br><a href="https://github.com/psipred/DMPfold">https://github.com/psipred/DMPfold</a>                                                                                                                      | [42]      |
| D-QUARK       | <a href="https://zhanggroup.org/D-QUARK/">https://zhanggroup.org/D-QUARK/</a>                                                                                                                                                                                                                     | [41]      |
| tFold         | <a href="https://drug.ai.tencent.com/console/en/tfold">https://drug.ai.tencent.com/console/en/tfold</a>                                                                                                                                                                                           | [43]      |
| trRosetta     | <a href="https://yanglab.qd.sdu.edu.cn/trRosetta/">https://yanglab.qd.sdu.edu.cn/trRosetta/</a><br><a href="https://github.com/gjoni/trRosetta">https://github.com/gjoni/trRosetta</a><br><a href="https://github.com/RosettaCommons/trRosetta2">https://github.com/RosettaCommons/trRosetta2</a> | [44, 45]  |

**Table S5.** Tools for end-to-end protein structure prediction.

| Methods     | URLs                                                                                                                                                                                          | Reference |
|-------------|-----------------------------------------------------------------------------------------------------------------------------------------------------------------------------------------------|-----------|
| AlphaFold2  | <a href="https://github.com/deepmind/">https://github.com/deepmind/</a><br><a href="https://github.com/google-deepmind/alphafold">https://github.com/google-deepmind/alphafold</a>            | [46]      |
| ColabFold   | <a href="https://github.com/sokrypton/ColabFold">https://github.com/sokrypton/ColabFold</a>                                                                                                   | [47]      |
| FastFold    | <a href="https://github.com/hpcaitech/FastFold">https://github.com/hpcaitech/FastFold</a>                                                                                                     | [48]      |
| HelixFold   | <a href="https://github.com/PaddlePaddle/PaddleHelix/tree/dev/apps/protein_folding/helixfold">https://github.com/PaddlePaddle/PaddleHelix/tree/dev/apps/protein_folding/helixfold</a>         | [49]      |
| MEGA-Fold   | <a href="https://gitee.com/mindspore/mindscience/tree/master/MindSPONGE/applications/MEGAProtein">https://gitee.com/mindspore/mindscience/tree/master/MindSPONGE/applications/MEGAProtein</a> | [50]      |
| OpenFold    | <a href="https://github.com/aqlaboratory/openfold">https://github.com/aqlaboratory/openfold</a>                                                                                               | [51]      |
| RoseTTAFold | <a href="https://robetta.bakerlab.org">https://robetta.bakerlab.org</a><br><a href="https://github.com/RosettaCommons/RoseTTAFold">https://github.com/RosettaCommons/RoseTTAFold</a>          | [52]      |
| Uni-Fold    | <a href="https://github.com/dptech-corp/Uni-Fold">https://github.com/dptech-corp/Uni-Fold</a>                                                                                                 | [53]      |



**Table S6.** Tools for protein language model-based protein structure prediction.

| Methods           | URLs                                                                                                                                                                                                | Reference |
|-------------------|-----------------------------------------------------------------------------------------------------------------------------------------------------------------------------------------------------|-----------|
| EMBER3D           | <a href="https://github.com/kWeissenow/EMBER3D">https://github.com/kWeissenow/EMBER3D</a>                                                                                                           | [54]      |
| ESM-Fold          | <a href="https://github.com/facebookresearch/esm">https://github.com/facebookresearch/esm</a>                                                                                                       | [55]      |
| HelixFold-Single  | <a href="https://github.com/PaddlePaddle/PaddleHelix/tree/dev/apps/protein_folding/helixfold-single">https://github.com/PaddlePaddle/PaddleHelix/tree/dev/apps/protein_folding/helixfold-single</a> | [56]      |
| IgFold            | <a href="https://github.com/Graylab/IgFold">https://github.com/Graylab/IgFold</a>                                                                                                                   | [57]      |
| OmegaFold         | <a href="https://github.com/HeliXonProtein/OmegaFold">https://github.com/HeliXonProtein/OmegaFold</a>                                                                                               | [58]      |
| RaptorX-Single    | <a href="https://github.com/AndersJing/RaptorX-Single">https://github.com/AndersJing/RaptorX-Single</a>                                                                                             | [59]      |
| trRosettaX-Single | <a href="https://yanglab.qd.sdu.edu.cn/trRosetta/benchmark_single">https://yanglab.qd.sdu.edu.cn/trRosetta/benchmark_single</a>                                                                     | [60]      |

**Table S7.** Tools for multi-domain protein structure prediction.

| Methods      | URLs                                                                                                  | Reference |
|--------------|-------------------------------------------------------------------------------------------------------|-----------|
| AIDA         | <a href="http://ffas.burnham.org/AIDA/">http://ffas.burnham.org/AIDA/</a>                             | [61]      |
| DeepAssembly | <a href="http://zhanglab-bioinf.com/DeepAssembly/">http://zhanglab-bioinf.com/DeepAssembly/</a>       | [62]      |
| DEMO         | <a href="https://zhanggroup.org/DEMO/">https://zhanggroup.org/DEMO/</a>                               | [63, 64]  |
| D-I-TASSER   | <a href="https://zhanggroup.org/D-I-TASSER/">https://zhanggroup.org/D-I-TASSER/</a>                   | [40, 41]  |
| E2EDA        | <a href="http://zhanglab-bioinf.com/E2EDA/">http://zhanglab-bioinf.com/E2EDA/</a>                     | [65]      |
| I-TASSER-MTD | <a href="https://zhanggroup.org/I-TASSER-MTD/">https://zhanggroup.org/I-TASSER-MTD/</a>               | [66]      |
| LOMETS3      | <a href="https://zhanglab.dcmf.med.umich.edu/LOMETS/">https://zhanglab.dcmf.med.umich.edu/LOMETS/</a> | [12-14]   |
| SADA         | <a href="http://zhanglab-bioinf.com/SADA/">http://zhanglab-bioinf.com/SADA/</a>                       | [67]      |

**Table S8.** The CASP14 benchmark dataset, including 65 full-length proteins and the corresponding 91 domains. The 91 domains can be divided as 54 TBM domains and 37 FM domains. The original CASP ‘TBM-easy’ and ‘TBM-hard’ domains are categorized as ‘TBM’ domains, while ‘FM/TBM’ and ‘FM’ domains are categorized as ‘FM’ domains in this analysis.

| Target      | Type | IDs                                                                                                                                                                                                                                                                                                                                                                                                                                                                                                                                           |
|-------------|------|-----------------------------------------------------------------------------------------------------------------------------------------------------------------------------------------------------------------------------------------------------------------------------------------------------------------------------------------------------------------------------------------------------------------------------------------------------------------------------------------------------------------------------------------------|
| Domain      | TBM  | T1024-D1,T1024-D2,T1025-D1,T1026-D1,T1028-D1,T1030-D1,T1030-D2,T1032-D1,<br>T1034-D1,T1036s1-D1,T1045s1-D1,T1045s2-D1,T1046s2-D1,T1047s2-D2,T1050-D1,<br>T1050-D2,T1050-D3,T1052-D1,T1052-D2,T1054-D1,T1056-D1,T1057-D1,T1058-D2,<br>T1060s2-D1,T1060s3-D1,T1061-D3,T1065s1-D1,T1067-D1,T1068-D1,T1070-D2,<br>T1070-D3,T1070-D4,T1073-D1,T1076-D1,T1078-D1,T1079-D1,T1083-D1,T1084-D1,<br>T1087-D1,T1089-D1,T1091-D1,T1091-D2,T1091-D3,T1091-D4,T1092-D1,T1092-D2,<br>T1093-D2,T1094-D1,T1095-D1,T1099-D1,T1100-D1,T1100-D2,T1101-D1,T1101-D2 |
|             | FM   | T1027-D1,T1029-D1,T1031-D1,T1033-D1,T1035-D1,T1037-D1,T1038-D1,T1038-D2,<br>T1039-D1,T1040-D1,T1041-D1,T1042-D1,T1043-D1,T1046s1-D1,T1047s1-D1,<br>T1047s2-D1,T1047s2-D3,T1049-D1,T1052-D3,T1053-D1,T1053-D2,T1055-D1,<br>T1058-D1,T1061-D1,T1061-D2,T1064-D1,T1065s2-D1,T1070-D1,T1074-D1,<br>T1080-D1,T1082-D1,T1090-D1,T1093-D1,T1093-D3,T1094-D2,T1096-D1,T1096-D2                                                                                                                                                                        |
| Full-length |      | T1024,T1025,T1026,T1027,T1028,T1029,T1030,T1031,T1032,T1033,T1034,T1035,<br>T1036s1,T1037,T1038,T1039,T1040,T1041,T1042,T1043,T1045s1,T1045s2,T1046s1,<br>T1046s2,T1047s1,T1047s2,T1049,T1050,T1052,T1053,T1054,T1055,T1056,T1057,<br>T1058,T1060s2,T1060s3,T1061,T1064,T1065s1,T1065s2,T1067,T1068,T1070,T1073,<br>T1074,T1076,T1078,T1079,T1080,T1082,T1083,T1084,T1087,T1089,T1090,T1091,<br>T1092,T1093,T1094,T1095,T1096,T1099,T1100,T1101                                                                                               |

## References

1. Zheng, W.; Wuyun, Q.; Li, Y.; Mortuza, S. M.; Zhang, C.; Pearce, R.; Ruan, J.; Zhang, Y., Detecting distant-homology protein structures by aligning deep neural-network based contact maps. *PLOS Computational Biology* **2019**, 15, (10), e1007411.
2. Llinares-López, F.; Berthet, Q.; Blondel, M.; Teboul, O.; Vert, J.-P., Deep embedding and alignment of protein sequences. *Nature Methods* **2023**, 20, (1), 104-111.
3. Bhattacharya, S.; Roche, R.; Moussad, B.; Bhattacharya, D., DisCover: distance- and orientation-based covariational threading for weakly homologous proteins. *Proteins: Structure, Function, and Bioinformatics* **2022**, 90, (2), 579-588.
4. Pantolini, L.; Studer, G.; Pereira, J.; Durairaj, J.; Tauriello, G.; Schwede, T., Embedding-based alignment: combining protein language models with dynamic programming alignment to detect structural similarities in the twilight-zone. *Bioinformatics* **2024**, 40, (1), btad786.
5. Buchan, D. W. A.; Jones, D. T., EigenTHREADER: analogous protein fold recognition by efficient contact map threading. *Bioinformatics* **2017**, 33, (17), 2684-2690.
6. Xu, D.; Jaroszewski, L.; Li, Z.; Godzik, A., FFAS-3D: improving fold recognition by including optimized structural features and template re-ranking. *Bioinformatics* **2014**, 30, (5), 660-667.
7. Meier, A.; Söding, J., Automatic Prediction of Protein 3D Structures by Probabilistic Multi-template Homology Modeling. *PLOS Computational Biology* **2015**, 11, (10), e1004343.
8. Söding, J., Protein homology detection by HMM–HMM comparison. *Bioinformatics* **2005**, 21, (7), 951-960.
9. Zheng, W.; Zhang, C.; Bell, E. W.; Zhang, Y., I-TASSER gateway: A protein structure and function prediction server powered by XSEDE. *Future generations computer systems : FGCS* **2019**, 99, 73-85.
10. Yang, J.; Zhang, Y., I-TASSER server: new development for protein structure and function predictions. *Nucleic Acids Research* **2015**, 43, (W1), W174-W181.
11. Zhang, Y., Template-based modeling and free modeling by I-TASSER in CASP7. *Proteins: Structure, Function, and Bioinformatics* **2007**, 69, (S8), 108-117.
12. Zheng, W.; Wuyun, Q.; Zhou, X.; Li, Y.; Freddolino, P. L.; Zhang, Y., LOMETS3: integrating deep learning and profile alignment for advanced protein template recognition and function annotation. *Nucleic Acids Research* **2022**, 50, (W1), W454-W464.
13. Zheng, W.; Zhang, C.; Wuyun, Q.; Pearce, R.; Li, Y.; Zhang, Y., LOMETS2: improved meta-threading server for fold-recognition and structure-based function annotation for distant-homology proteins. *Nucleic Acids Research* **2019**, 47, (W1), W429-W436.
14. Wu, S.; Zhang, Y., LOMETS: A local meta-threading-server for protein structure prediction. *Nucleic Acids Research* **2007**, 35, (10), 3375-3382.
15. Ovchinnikov, S.; Park, H.; Varghese, N.; Huang, P.-S.; Pavlopoulos, G. A.; Kim, D. E.; Kamisetty, H.; Kyrpides, N. C.; Baker, D., Protein structure determination using metagenome sequence data. *Science* **2017**, 355, (6322), 294-298.
16. Šali, A.; Blundell, T. L., Comparative Protein Modelling by Satisfaction of Spatial Restraints. *Journal of Molecular Biology* **1993**, 234, (3), 779-815.
17. Ma, J.; Wang, S.; Wang, Z.; Xu, J., MRFalign: Protein Homology Detection through Alignment of Markov Random Fields. *PLOS Computational Biology* **2014**, 10, (3), e1003500.

18. Cheng, J.; Li, J.; Wang, Z.; Eickholt, J.; Deng, X., The MULTICOM toolbox for protein structure prediction. *BMC Bioinformatics* **2012**, 13, (1), 65.
19. Cheng, J., A multi-template combination algorithm for protein comparative modeling. *BMC Structural Biology* **2008**, 8, (1), 18.
20. Wu, S.; Zhang, Y., MUSTER: Improving protein sequence profile–profile alignments by using multiple sources of structure information. *Proteins: Structure, Function, and Bioinformatics* **2008**, 72, (2), 547-556.
21. Kelley, L. A.; Mezulis, S.; Yates, C. M.; Wass, M. N.; Sternberg, M. J. E., The Phyre2 web portal for protein modeling, prediction and analysis. *Nature Protocols* **2015**, 10, (6), 845-858.
22. Kaminski, K.; Ludwiczak, J.; Pawlicki, K.; Alva, V.; Dunin-Horkawicz, S., pLM-BLAST: distant homology detection based on direct comparison of sequence representations from protein language models. *Bioinformatics* **2023**, 39, (10), btad579.
23. Källberg, M.; Wang, H.; Wang, S.; Peng, J.; Wang, Z.; Lu, H.; Xu, J., Template-based protein structure modeling using the RaptorX web server. *Nature Protocols* **2012**, 7, (8), 1511-1522.
24. Peng, J.; Xu, J., Raptorx: Exploiting structure information for protein alignment by statistical inference. *Proteins: Structure, Function, and Bioinformatics* **2011**, 79, (S10), 161-171.
25. Song, Y.; DiMaio, F.; Wang, Ray Y.-R.; Kim, D.; Miles, C.; Brunette, T. J.; Thompson, J.; Baker, D., High-Resolution Comparative Modeling with RosettaCM. *Structure* **2013**, 21, (10), 1735-1742.
26. Gao, M.; Skolnick, J., A novel sequence alignment algorithm based on deep learning of the protein folding code. *Bioinformatics* **2021**, 37, (4), 490-496.
27. Yang, Y.; Faraggi, E.; Zhao, H.; Zhou, Y., Improving protein fold recognition and template-based modeling by employing probabilistic-based matching between predicted one-dimensional structural properties of query and corresponding native properties of templates. *Bioinformatics* **2011**, 27, (15), 2076-2082.
28. Zhang, H.; Shen, Y., Template-based prediction of protein structure with deep learning. *BMC Genomics* **2020**, 21, (11), 878.
29. Jones, D. T., Predicting novel protein folds by using FRAGFOLD. *Proteins: Structure, Function, and Bioinformatics* **2001**, 45, (S5), 127-132.
30. Xu, D.; Zhang, Y., Ab initio protein structure assembly using continuous structure fragments and optimized knowledge-based force field. *Proteins: Structure, Function, and Bioinformatics* **2012**, 80, (7), 1715-1735.
31. Simons, K. T.; Kooperberg, C.; Huang, E.; Baker, D., Assembly of protein tertiary structures from fragments with similar local sequences using simulated annealing and bayesian scoring functions<sup>11</sup>Edited by F. E. Cohen. *Journal of Molecular Biology* **1997**, 268, (1), 209-225.
32. Rohl, C. A.; Strauss, C. E. M.; Misura, K. M. S.; Baker, D., Protein Structure Prediction Using Rosetta. In *Methods in Enzymology*, Academic Press: 2004; Vol. 383, pp 66-93.
33. Zheng, W.; Zhang, C.; Li, Y.; Pearce, R.; Bell, E. W.; Zhang, Y., Folding non-homologous proteins by coupling deep-learning contact maps with I-TASSER assembly simulations. *Cell reports methods* **2021**, 1, (3).
34. Adhikari, B.; Cheng, J., CONFOLD2: improved contact-driven ab initio protein structure modeling. *BMC Bioinformatics* **2018**, 19, (1), 22.

35. Mortuza, S. M.; Zheng, W.; Zhang, C.; Li, Y.; Pearce, R.; Zhang, Y., Improving fragment-based ab initio protein structure assembly using low-accuracy contact-map predictions. *Nature Communications* **2021**, 12, (1), 5011.
36. Wang, S.; Sun, S.; Li, Z.; Zhang, R.; Xu, J., Accurate De Novo Prediction of Protein Contact Map by Ultra-Deep Learning Model. *PLOS Computational Biology* **2017**, 13, (1), e1005324.
37. Pearce, R.; Li, Y.; Omenn, G. S.; Zhang, Y., Fast and accurate Ab Initio Protein structure prediction using deep learning potentials. *PLOS Computational Biology* **2022**, 18, (9), e1010539.
38. Li, Y.; Zhang, C.; Yu, D.-J.; Zhang, Y., Deep learning geometrical potential for high-accuracy ab initio protein structure prediction. *iScience* **2022**, 25, (6).
39. Zhu, J.; Wang, S.; Bu, D.; Xu, J., Protein threading using residue co-variation and deep learning. *Bioinformatics* **2018**, 34, (13), i263-i273.
40. Zheng, W.; Wuyun, Q.; Freddolino, P. L.; Zhang, Y., Integrating deep learning, threading alignments, and a multi-MSA strategy for high-quality protein monomer and complex structure prediction in CASP15. *Proteins: Structure, Function, and Bioinformatics* **2023**, 91, (12), 1684-1703.
41. Zheng, W.; Li, Y.; Zhang, C.; Zhou, X.; Pearce, R.; Bell, E. W.; Huang, X.; Zhang, Y., Protein structure prediction using deep learning distance and hydrogen-bonding restraints in CASP14. *Proteins: Structure, Function, and Bioinformatics* **2021**, 89, (12), 1734-1751.
42. Greener, J. G.; Kandathil, S. M.; Jones, D. T., Deep learning extends de novo protein modelling coverage of genomes using iteratively predicted structural constraints. *Nature Communications* **2019**, 10, (1), 3977.
43. Shen, T.; Wu, J.; Lan, H.; Zheng, L.; Pei, J.; Wang, S.; Liu, W.; Huang, J., When homologous sequences meet structural decoys: Accurate contact prediction by tFold in CASP14—(tFold for CASP14 contact prediction). *Proteins: Structure, Function, and Bioinformatics* **2021**, 89, (12), 1901-1910.
44. Yang, J.; Anishchenko, I.; Park, H.; Peng, Z.; Ovchinnikov, S.; Baker, D., Improved protein structure prediction using predicted interresidue orientations. *Proceedings of the National Academy of Sciences* **2020**, 117, (3), 1496-1503.
45. Du, Z.; Su, H.; Wang, W.; Ye, L.; Wei, H.; Peng, Z.; Anishchenko, I.; Baker, D.; Yang, J., The trRosetta server for fast and accurate protein structure prediction. *Nature Protocols* **2021**, 16, (12), 5634-5651.
46. Jumper, J.; Evans, R.; Pritzel, A.; Green, T.; Figurnov, M.; Ronneberger, O.; Tunyasuvunakool, K.; Bates, R.; Židek, A.; Potapenko, A.; Bridgland, A.; Meyer, C.; Kohl, S. A. A.; Ballard, A. J.; Cowie, A.; Romera-Paredes, B.; Nikolov, S.; Jain, R.; Adler, J.; Back, T.; Petersen, S.; Reiman, D.; Clancy, E.; Zielinski, M.; Steinegger, M.; Pacholska, M.; Berghammer, T.; Bodenstein, S.; Silver, D.; Vinyals, O.; Senior, A. W.; Kavukcuoglu, K.; Kohli, P.; Hassabis, D., Highly accurate protein structure prediction with AlphaFold. *Nature* **2021**, 596, (7873), 583-589.
47. Mirdita, M.; Schütze, K.; Moriwaki, Y.; Heo, L.; Ovchinnikov, S.; Steinegger, M., ColabFold: making protein folding accessible to all. *Nature Methods* **2022**, 19, (6), 679-682.
48. Cheng, S.; Zhao, X.; Lu, G.; Fang, J.; Yu, Z.; Zheng, T.; Wu, R.; Zhang, X.; Peng, J.; You, Y., FastFold: Reducing AlphaFold Training Time from 11 Days to 67 Hours. *arxiv:2203.00854[cs.LG,cs.AI,cs.DC,q-bio.QM]* **2022**.

49. Wang, G.; Fang, X.; Wu, Z.; Liu, Y.; Xue, Y.; Xiang, Y.; Yu, D.; Wang, F.; Ma, Y., HelixFold: An Efficient Implementation of AlphaFold2 using PaddlePaddle. *arxiv:2207.05477[cs.DC,cs.LG,q-bio.BM]* **2022**.
50. Liu, S.; Zhang, J.; Chu, H.; Wang, M.; Xue, B.; Ni, N.; Yu, J.; Xie, Y.; Chen, Z.; Chen, M.; Liu, Y.; Patra, P.; Xu, F.; Chen, J.; Wang, Z.; Yang, L.; Yu, F.; Chen, L.; Gao, Y. Q., PSP: Million-level Protein Sequence Dataset for Protein Structure Prediction. *arxiv:2206.12240[q-bio.BM,cs.LG]* **2022**.
51. Gustaf, A.; Nazim, B.; Christina, F.; Sachin, K.; Qinghui, X.; William, G.; Timothy, J. O. D.; Daniel, B.; Ian, F.; Niccolò, Z.; Bo, Z.; Arkadiusz, N.; Bei, W.; Marta, M. S.-D.; Shang, Z.; Adegoke, O.; Murat Efe, G.; Stella, B.; Andrew, M. W.; Stephen, R.; Pablo Ribalta, L.; Lucas, N.; Brian, W.; Yih-En Andrew, B.; Peter, K. S.; Emad, M.; Zhao, Z.; Richard, B.; Mohammed, A., OpenFold: Retraining AlphaFold2 yields new insights into its learning mechanisms and capacity for generalization. *bioRxiv* **2023**, 2022.11.20.517210.
52. Baek, M.; DiMaio, F.; Anishchenko, I.; Dauparas, J.; Ovchinnikov, S.; Lee, G. R.; Wang, J.; Cong, Q.; Kinch, L. N.; Schaeffer, R. D.; Millán, C.; Park, H.; Adams, C.; Glassman, C. R.; DeGiovanni, A.; Pereira, J. H.; Rodrigues, A. V.; van Dijk, A. A.; Ebrecht, A. C.; Opperman, D. J.; Sagmeister, T.; Buhlheller, C.; Pavkov-Keller, T.; Rathinaswamy, M. K.; Dalwadi, U.; Yip, C. K.; Burke, J. E.; Garcia, K. C.; Grishin, N. V.; Adams, P. D.; Read, R. J.; Baker, D., Accurate prediction of protein structures and interactions using a three-track neural network. *Science* **2021**, 373, (6557), 871-876.
53. Ziyao, L.; Xuyang, L.; Weijie, C.; Fan, S.; Hangrui, B.; Guolin, K.; Linfeng, Z., Uni-Fold: An Open-Source Platform for Developing Protein Folding Models beyond AlphaFold. *bioRxiv* **2022**, 2022.08.04.502811.
54. Konstantin, W.; Michael, H.; Martin, S.; Burkhard, R., Ultra-fast protein structure prediction to capture effects of sequence variation in mutation movies. *bioRxiv* **2022**, 2022.11.14.516473.
55. Lin, Z.; Akin, H.; Rao, R.; Hie, B.; Zhu, Z.; Lu, W.; Smetanin, N.; Verkuil, R.; Kabeli, O.; Shmueli, Y.; dos Santos Costa, A.; Fazel-Zarandi, M.; Sercu, T.; Candido, S.; Rives, A., Evolutionary-scale prediction of atomic-level protein structure with a language model. *Science* **2023**, 379, (6637), 1123-1130.
56. Fang, X.; Wang, F.; Liu, L.; He, J.; Lin, D.; Xiang, Y.; Zhu, K.; Zhang, X.; Wu, H.; Li, H.; Song, L., A method for multiple-sequence-alignment-free protein structure prediction using a protein language model. *Nature Machine Intelligence* **2023**, 5, (10), 1087-1096.
57. Ruffolo, J. A.; Chu, L.-S.; Mahajan, S. P.; Gray, J. J., Fast, accurate antibody structure prediction from deep learning on massive set of natural antibodies. *Nature Communications* **2023**, 14, (1), 2389.
58. Ruidong, W.; Fan, D.; Rui, W.; Rui, S.; Xiwen, Z.; Shitong, L.; Chenpeng, S.; Zuofan, W.; Qi, X.; Bonnie, B.; Jianzhu, M.; Jian, P., High-resolution & de novo structure prediction from primary sequence. *bioRxiv* **2022**, 2022.07.21.500999.
59. Xiaoyang, J.; Fandi, W.; Jinbo, X., RaptorX-Single: single-sequence protein structure prediction by integrating protein language models. *bioRxiv* **2023**, 2023.04.24.538081.
60. Wang, W.; Peng, Z.; Yang, J., Single-sequence protein structure prediction using supervised transformer protein language models. *Nature Computational Science* **2022**, 2, (12), 804-814.

61. Xu, D.; Jaroszewski, L.; Li, Z.; Godzik, A., AIDA: ab initio domain assembly for automated multi-domain protein structure prediction and domain–domain interaction prediction. *Bioinformatics* **2015**, 31, (13), 2098-2105.
62. Xia, Y.; Zhao, K.; Liu, D.; Zhou, X.; Zhang, G., Multi-domain and complex protein structure prediction using inter-domain interactions from deep learning. *Communications Biology* **2023**, 6, (1), 1221.
63. Zhou, X.; Peng, C.; Zheng, W.; Li, Y.; Zhang, G.; Zhang, Y., DEMO2: Assemble multi-domain protein structures by coupling analogous template alignments with deep-learning inter-domain restraint prediction. *Nucleic Acids Research* **2022**, 50, (W1), W235-W245.
64. Zhou, X.; Hu, J.; Zhang, C.; Zhang, G.; Zhang, Y., Assembling multidomain protein structures through analogous global structural alignments. **2019**, 116, (32), 15930-15938.
65. Zhu, H.-T.; Xia, Y.-H.; Zhang, G.-J., E2EDA: Protein Domain Assembly Based on End-to-End Deep Learning. *Journal of Chemical Information and Modeling* **2023**, 63, (20), 6451-6461.
66. Zhou, X.; Zheng, W.; Li, Y.; Pearce, R.; Zhang, C.; Bell, E. W.; Zhang, G.; Zhang, Y., I-TASSER-MTD: a deep-learning-based platform for multi-domain protein structure and function prediction. *Nature Protocols* **2022**, 17, (10), 2326-2353.
67. Peng, C.-X.; Zhou, X.-G.; Xia, Y.-H.; Liu, J.; Hou, M.-H.; Zhang, G.-J., Structural analogue-based protein structure domain assembly assisted by deep learning. *Bioinformatics* **2022**, 38, (19), 4513-4521.
